# Supplementary material
Source: PubMed Central journal article supplement (PMC9188980)
Supplement: mmc1.pdf [file mmc1.pdf]

## Supplementary materials

**Supplementary Table 1. Reference values and serum levels of biomarkers analyzed in this study.**

| Biomarker | Unit      | Reference value <sup>#1</sup> | Stage | Concentration, mean $\pm$ SD, [n] |                     |                    |                    |                     |                    |
|-----------|-----------|-------------------------------|-------|-----------------------------------|---------------------|--------------------|--------------------|---------------------|--------------------|
|           |           |                               |       | MM group                          |                     | SC group           |                    |                     |                    |
|           |           |                               |       | Mild (All)                        | Moderate (All)      | Moderate (1st day) | Severe (1st day)   | Critical (1st day)  | Mild (recovery)    |
| cohort_1  | SFN       | ng/mL                         | 0.9   | 0.5 $\pm$ 0.2 [14]                | 1.1 $\pm$ 0.5 [18]  | 1.4 $\pm$ 1.0 [13] | 5.9 $\pm$ 9.1 [18] | 7.3 $\pm$ 7.7 [7]   | 0.8 $\pm$ 0.2 [7]  |
|           | P-SEP     | pg/mL                         | 323   | 183 $\pm$ 70 [14]                 | 377 $\pm$ 308 [18]  | 675 $\pm$ 735 [13] | 935 $\pm$ 957 [18] | 1284 $\pm$ 1947 [7] | 163 $\pm$ 50 [7]   |
|           | KAL       | $\mu$ g/mL                    | 6.0   | 12.1 $\pm$ 3.3 [14]               | 7.7 $\pm$ 2.9 [18]  | 8.2 $\pm$ 2.1 [13] | 6.0 $\pm$ 2.2 [18] | 5.1 $\pm$ 2.1 [7]   | 15.4 $\pm$ 3.1 [7] |
|           | KL-6      | U/mL                          | 378   | 256 $\pm$ 61 [14]                 | 224 $\pm$ 78 [17]   | 280 $\pm$ 210 [13] | 281 $\pm$ 217 [18] | 409 $\pm$ 467 [7]   | 589 $\pm$ 323 [7]  |
|           | SP-D      | ng/mL                         | 144   | 65 $\pm$ 39 [14]                  | 36 $\pm$ 35 [15]    | 67 $\pm$ 129 [8]   | 47 $\pm$ 55 [16]   | 223 $\pm$ 227 [7]   | 145 $\pm$ 73 [7]   |
|           | S/F ratio | -                             | -     | 467 $\pm$ 4 [14]                  | 460 $\pm$ 8 [18]    | 449 $\pm$ 16 [12]  | 327 $\pm$ 58 [18]  | 157 $\pm$ 39 [7]    | 458 $\pm$ 6 [7]    |
| cohort_2  | SFN       | ng/mL                         | -     | 0.6 $\pm$ 0.8 [61]                | 1.0 $\pm$ 1.7 [158] | 2.4 $\pm$ 2.0 [6]  | 4.6 $\pm$ 6.0 [13] | 13.3 $\pm$ 10.5 [4] | 3.0 $\pm$ 3.0 [4]  |
|           | P-SEP     | pg/mL                         | -     | 283 $\pm$ 138 [60]                | 396 $\pm$ 322 [158] | 653 $\pm$ 334 [6]  | 621 $\pm$ 409 [13] | 802 $\pm$ 137 [4]   | 227 $\pm$ 32 [4]   |
|           | S/F ratio | -                             | -     | 466 $\pm$ 7 [61]                  | 462 $\pm$ 7 [156]   | 447 $\pm$ 24 [6]   | 354 $\pm$ 40 [6]   | 203 $\pm$ 67 [3]    | 459 $\pm$ 7 [4]    |

Serum concentrations in each stage of COVID-19 severity for the MM and SC groups are indicated. For the MM group, mean concentration  $\pm$  SD in all samples taken during hospitalization are shown. For the SC group, values in samples taken on the first day of indicated stages are shown. <sup>#1</sup>, For the reference value of each biomarker, we calculated the upper (SFN, P-SEP, KL-6, SP-D) or lower (KAL) values of the mean concentration  $\pm$  2 SD values of samples at mild stage in the MM group.

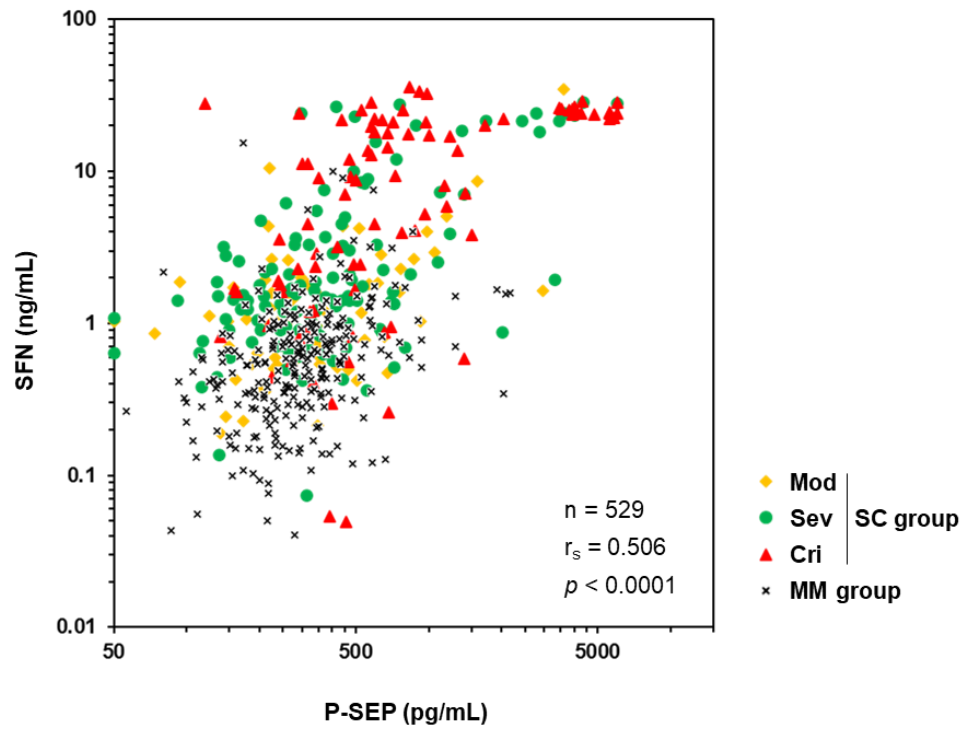

**Supplementary Figure 1. Correlation of serum SFN and P-SEP levels.** The two-dimensional scatter graph shows serum levels of SFN and P-SEP in the MM group samples, and all samples taken at the moderate (Mod), severe (Sev) and critical (Cri) stages in the SC group. The values of the correlation coefficients  $r_s$  and  $p$  were given by Spearman's correlation analysis.
